# Supplementary material for: The influence of Pluronics nanovehicles on dark cytotoxicity, photocytotoxicity and localization of four model photosensitizers in cancer cells
Source: Royal Society of Chemistry journal article supplement (doi:10.1039/c3pp50181g), 2013-01-01
Supplement: c3pp50181g.pdf [file c3pp50181g.pdf]

## Supplementary data

Fig. S1

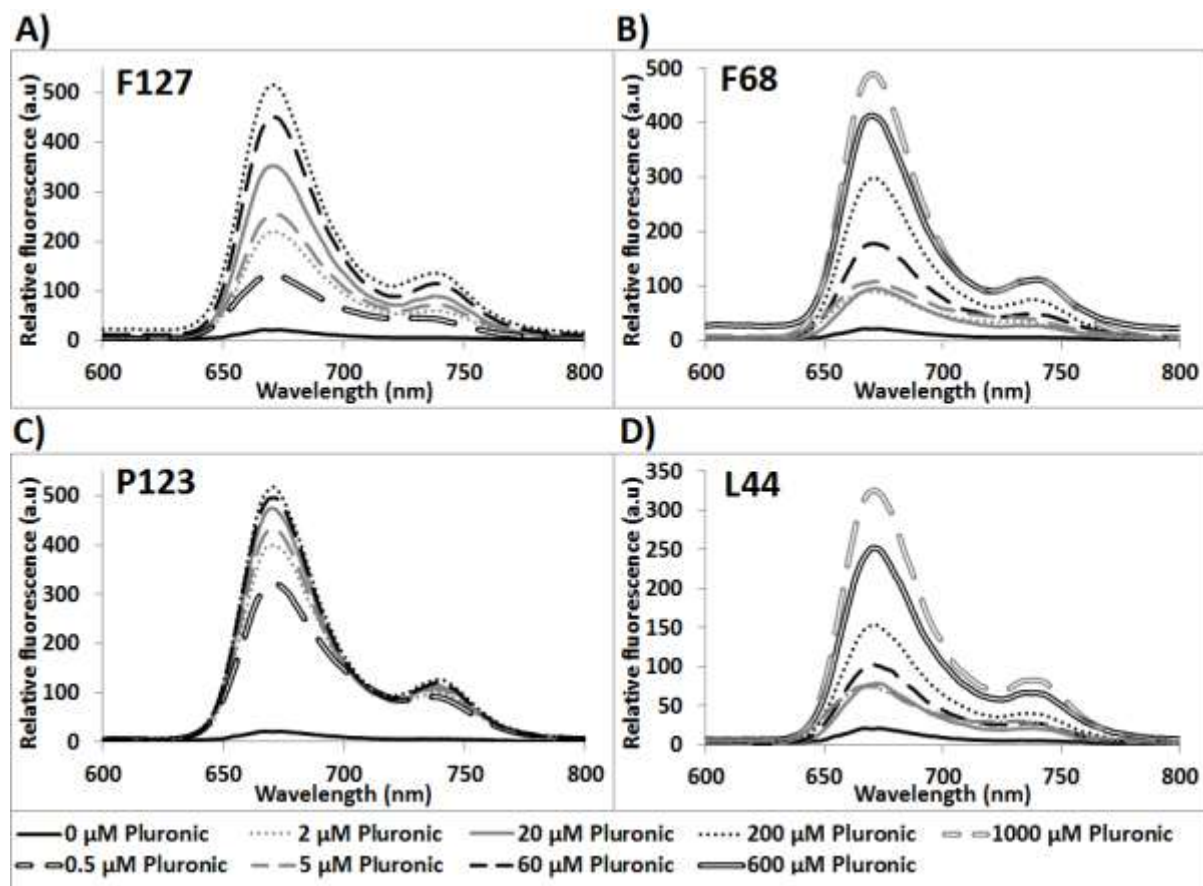

Fluorescence emission spectra ( $\lambda_{\text{ex}} = 423 \text{ nm}$ ) of THPP ( $0.05 \mu\text{M}$ ) in PBS solubilized by F127 (A), F68 (B), P123 (C) or L44 (D). One fluorescence spectrum, representative for 5 replicate experiments is presented.

Fig. S2

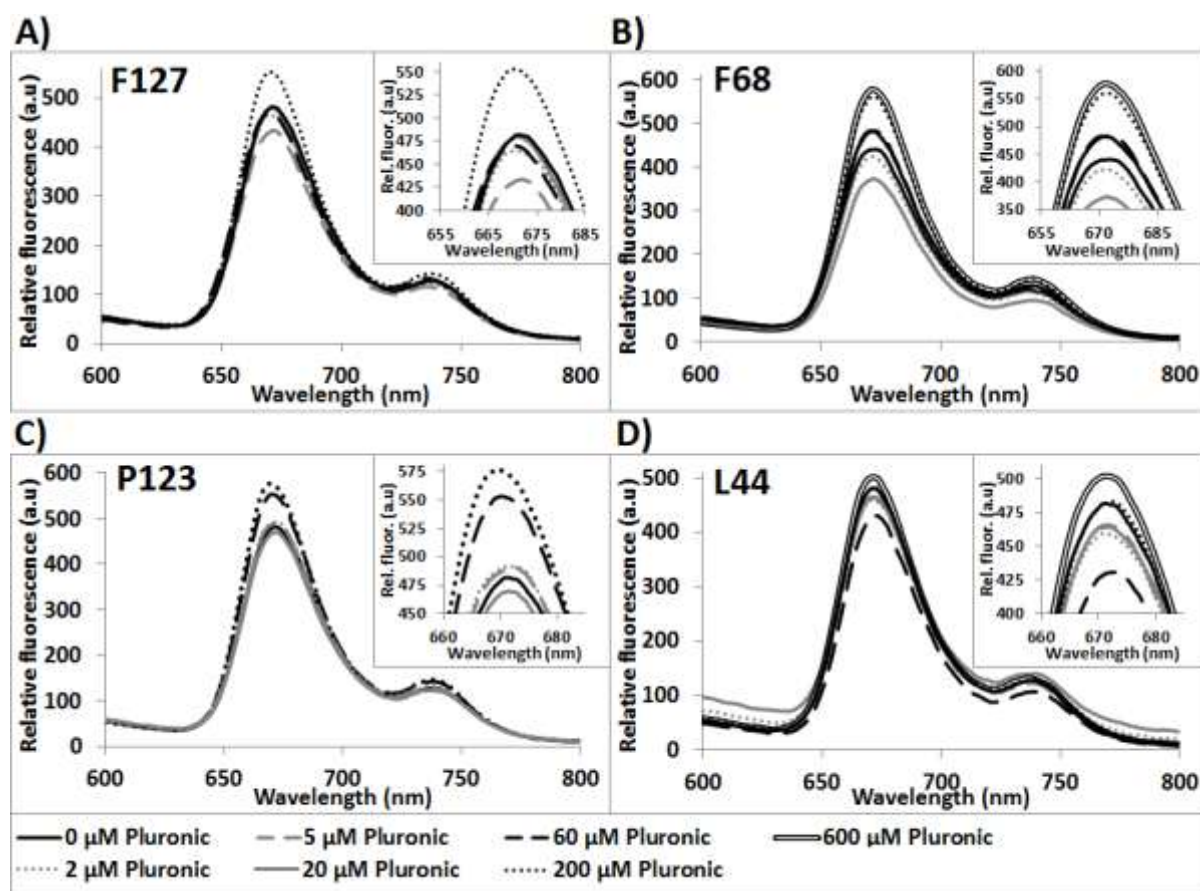

Fluorescence emission spectra ( $\lambda_{\text{ex}} = 423 \text{ nm}$ ) of THPP (0.05  $\mu\text{M}$ ) in 10 % FCS in PBS solubilized by F127 (A), F68 (B), P123 (C) or L44 (D). One fluorescence spectrum, representative for 5 replicate experiments is presented. Insets present the main fluorescence emission band. Rel. fluor. = Relative fluorescence.

Fig. S3

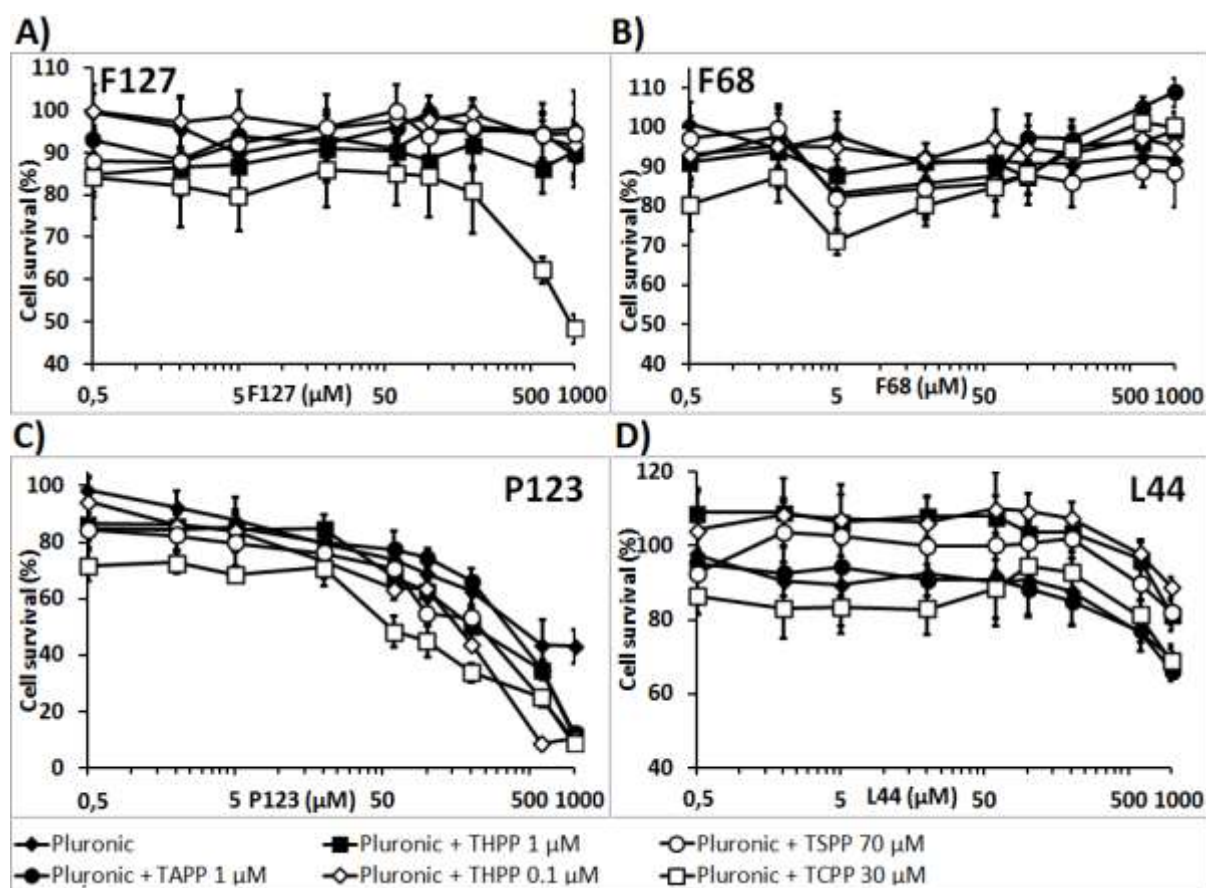

Cell survival of WiDr cells after 18 hours treatment in the dark with Pluronic alone and in combination with four different PS as indicated on the figure. Horizontal axes are presented in a logarithmic scale. The results are presented as mean  $\pm$  SD (n = 6) of one experiment, and are representative of two separate experiments. The cell survival is normalized against untreated control. Cells were incubated with 10 % FCS.

Fig. S4

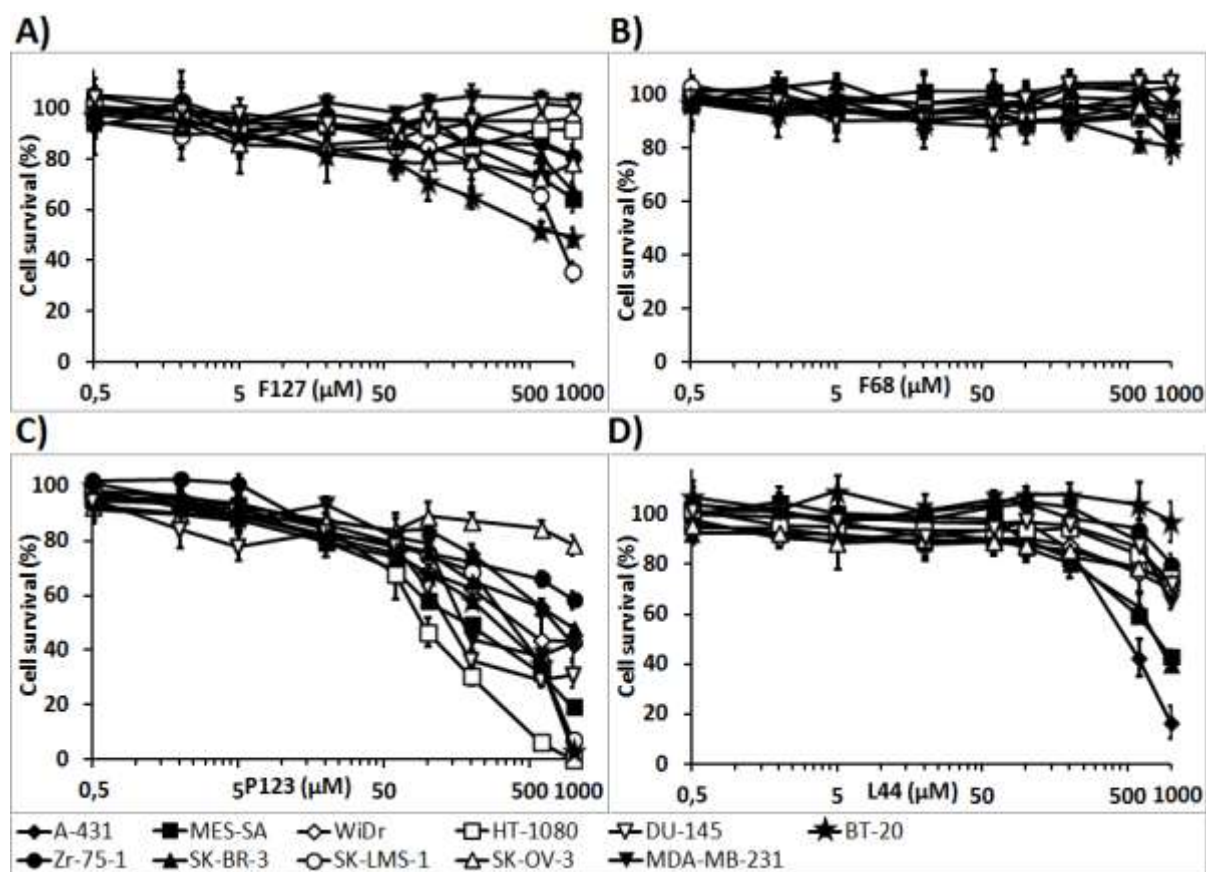

Fig. S5

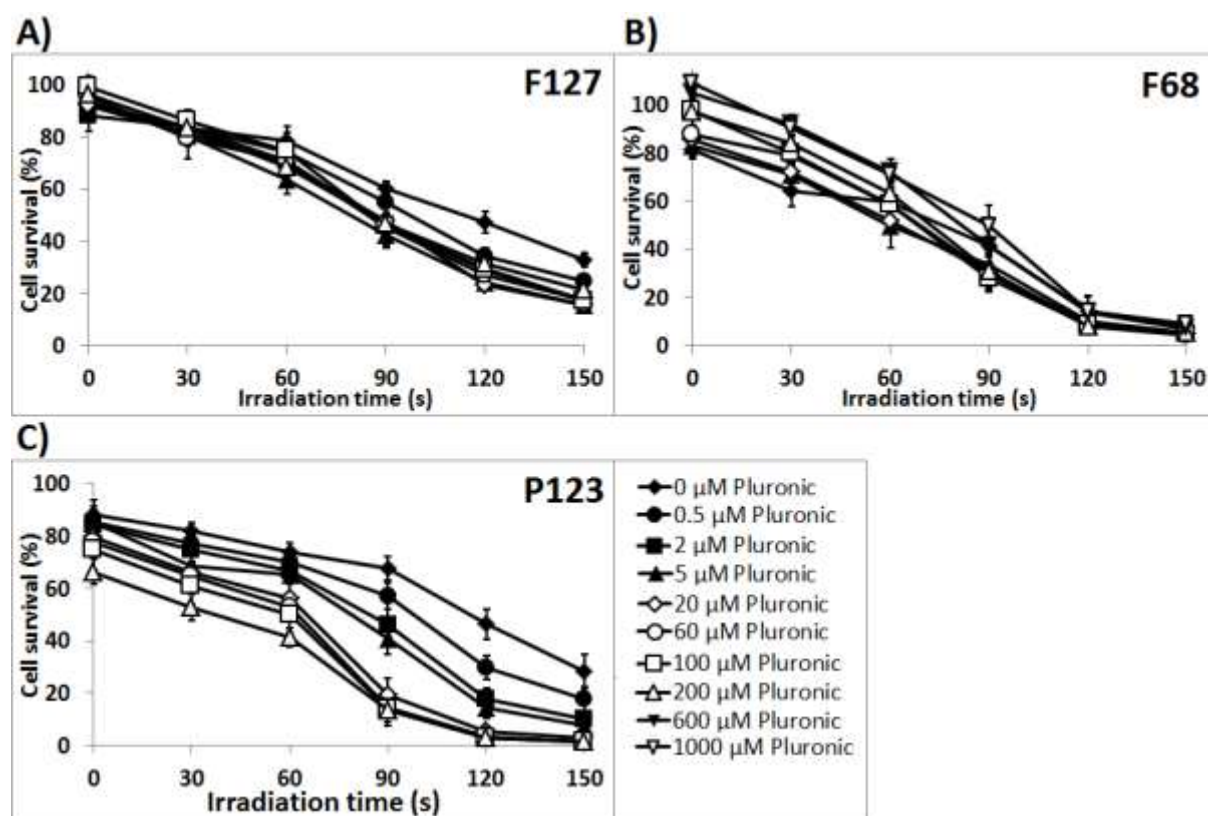

Cell survival of WiDr cells after 18 hours incubation with formulations containing 1  $\mu\text{M}$  TAPP and Pluronic and subsequently exposed to light. The results are presented as mean  $\pm$  SD ( $n = 6$ ) of one experiment, and are representative of two separate experiments. The cell survival is normalized against untreated control. Cells were incubated with 10 % FCS.

Fig. S6

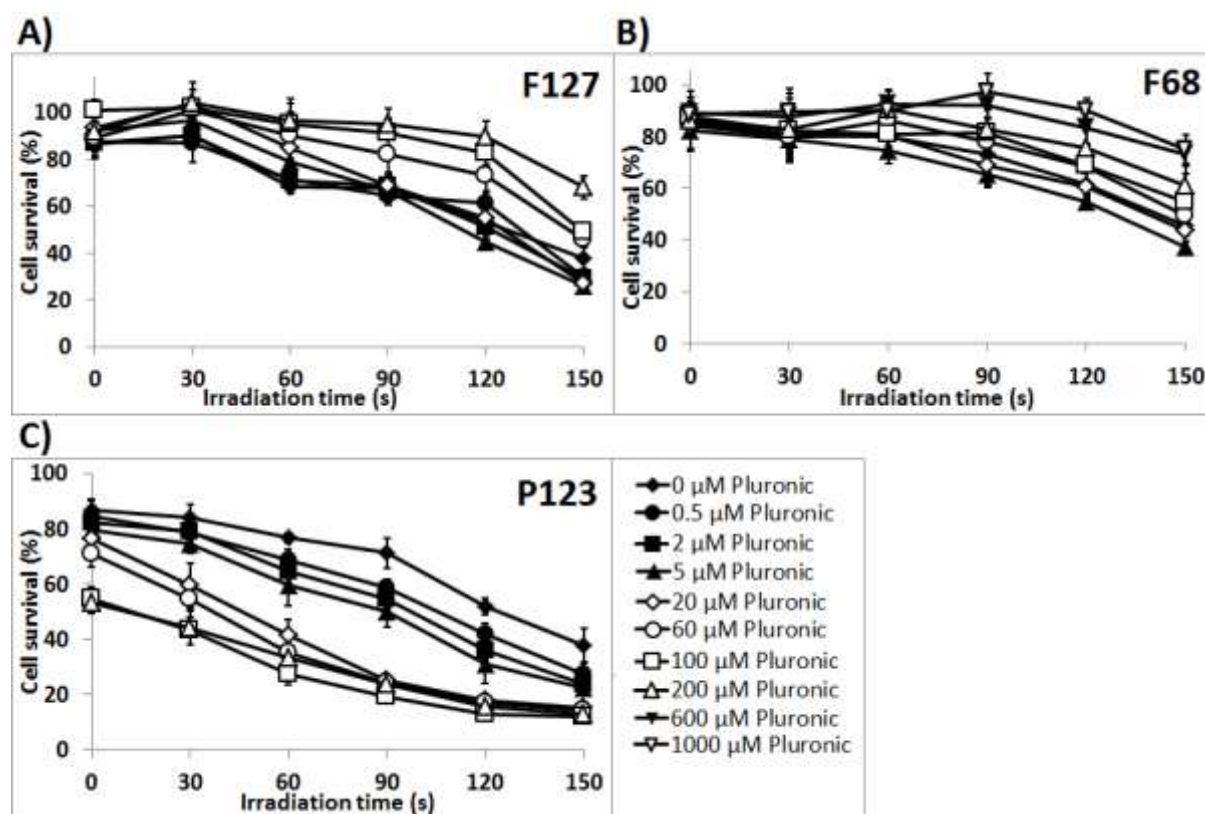

Cell survival of WiDr cells after 18 hours incubation with formulations containing 70  $\mu\text{M}$  TSPP and Pluronic and subsequently exposed to light. The results are presented as mean  $\pm$  SD ( $n = 6$ ) of one experiment, and are representative of two separate experiments. The cell survival is normalized against untreated control. Cells were incubated with 10 % FCS.

Fig. S7

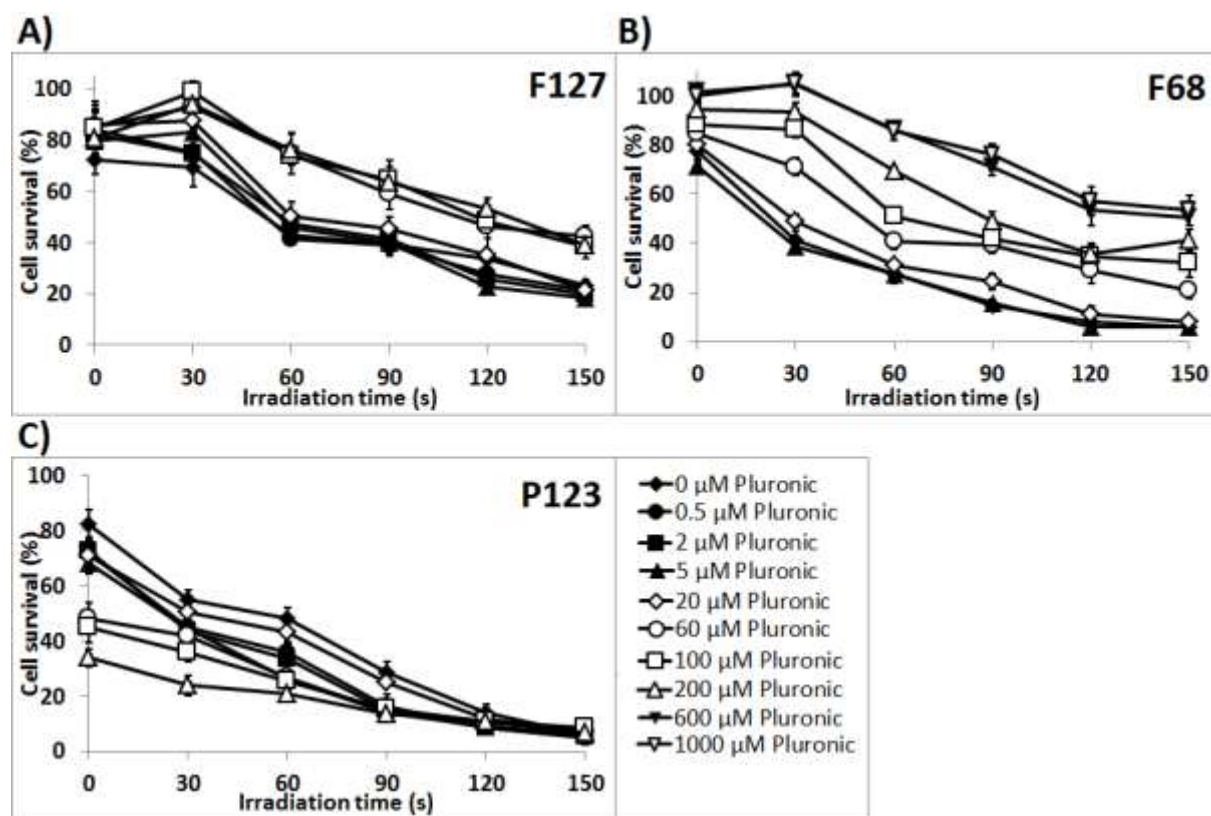

Cell survival of WiDr cells after 18 hours incubation with formulations containing 30 μM TCPP and Pluronic and subsequently exposed to light. The results are presented as mean ± SD (n = 6) of one experiment, and are representative of two separate experiments. The cell survival is normalized against untreated control. Cells were incubated with 10 % FCS.

Fig. S8

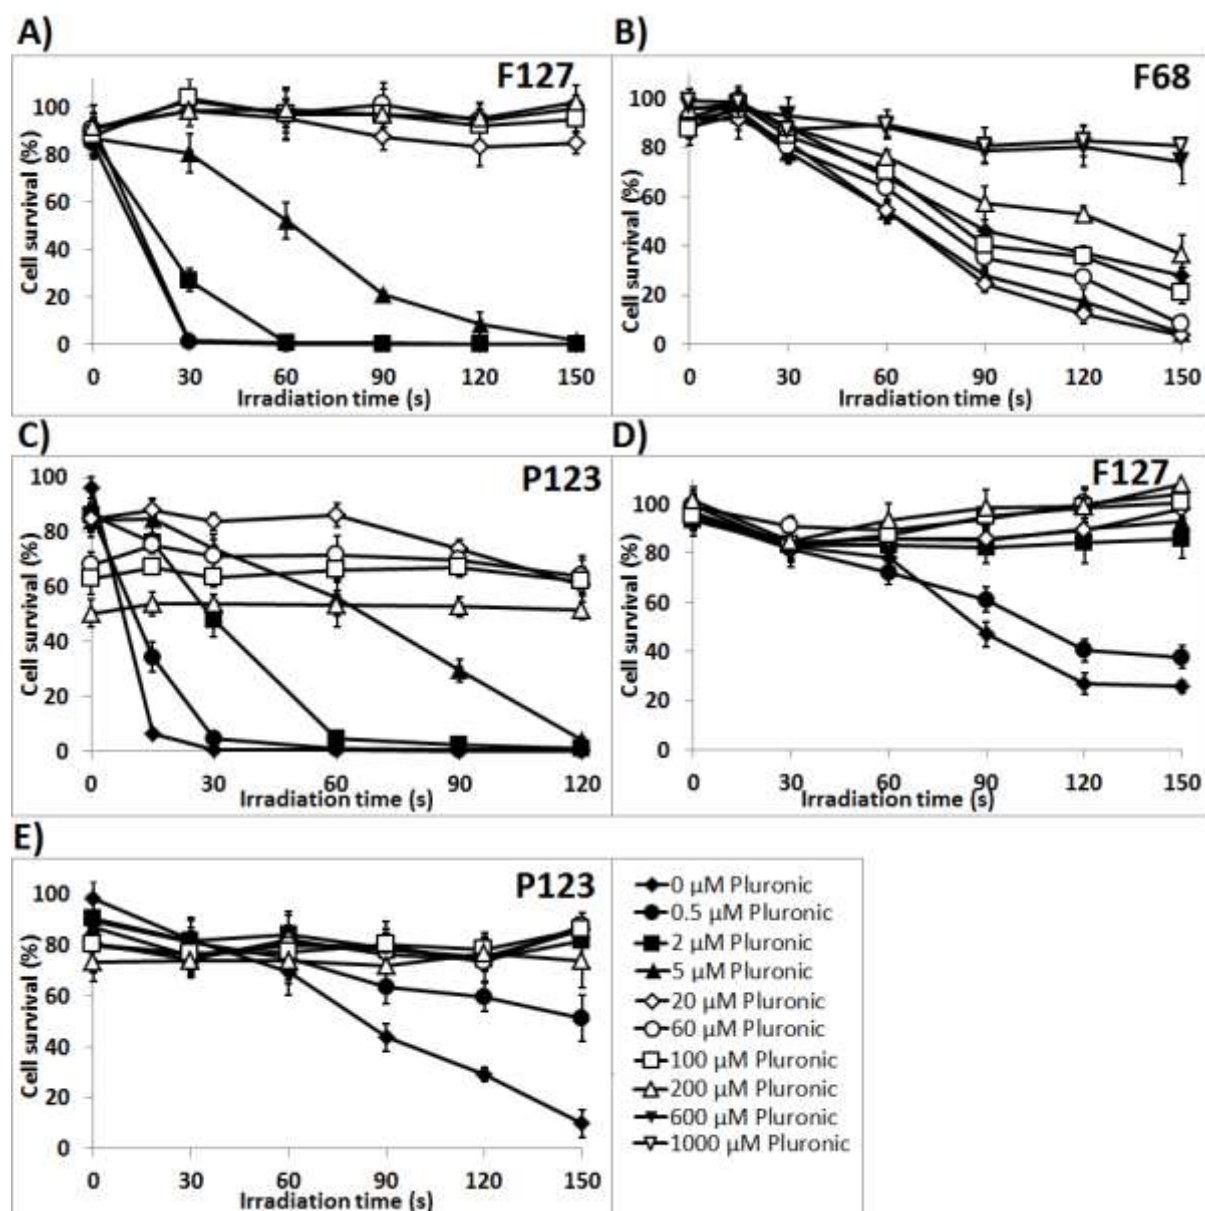

Cell survival of WiDr cells after 18 hours incubation with formulations containing 0.1  $\mu$ M THPP (B, D, E) or 1  $\mu$ M THPP (A, C) and Pluronic F127 (A, D), F68 (B), P123 (C, E) and subsequently exposed to light. The results are presented as mean  $\pm$  SD (n = 6) of one experiment, and are representative of two separate experiments. The cell survival is normalized against untreated control. Cells were incubated with 10 % FCS.



Fig. S9

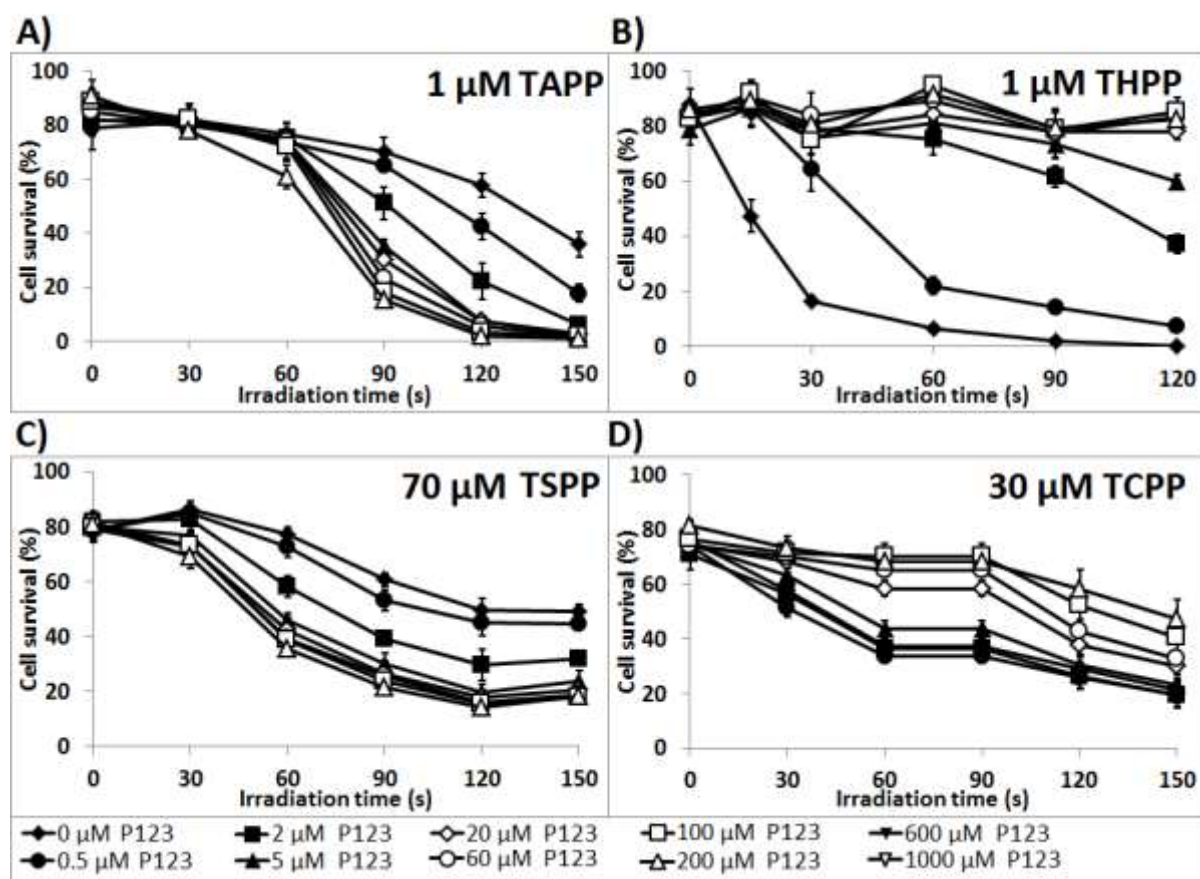

Cell survival of SK-OV-3 cells after 18 hours incubation with formulations containing PS and P123 and subsequently exposed to light. Results are presented as mean  $\pm$  SD ( $n = 6$ ) of one experiment, and are representative of two separate experiments. The cell survival is normalized against untreated control. Cells were incubated with 10 % FCS.

Fig. S10

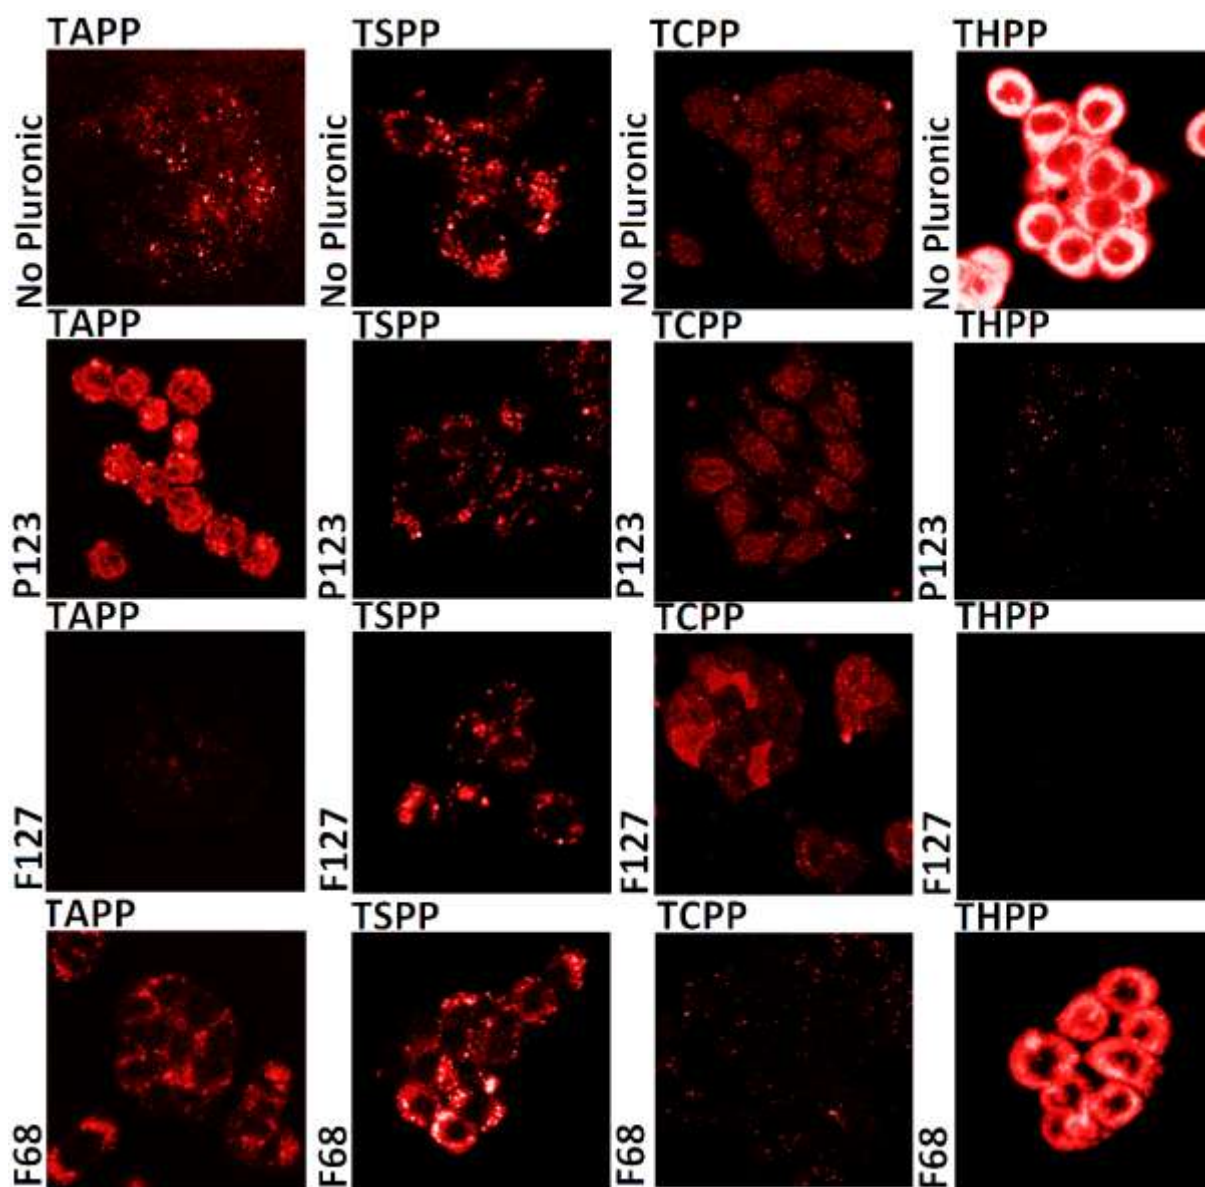

Confocal microscopy images of WiDr cells incubated for 18 hours with 10 % FCS and 1  $\mu$ M TAPP or THPP, or 70  $\mu$ M TSPP or TCPP, alone or in preparations with 100  $\mu$ M P123 or F127 or F68. The fluorescence in the images is directly comparable to each other. The figure is based on Figs. 7 and 8, but the fluorescence has been adjusted to allow for direct comparisons within the figure.

Fig. S11

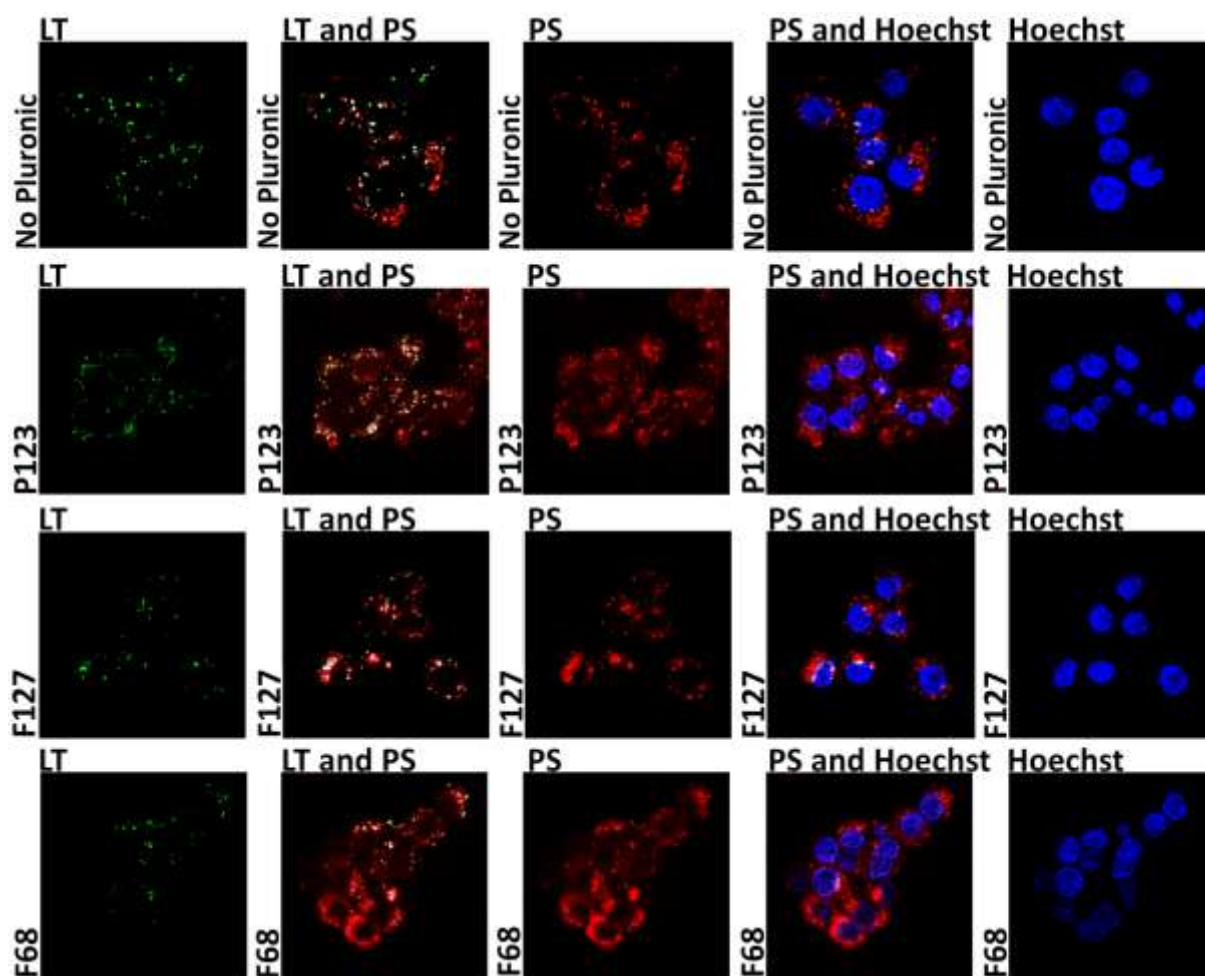

Confocal microscopy images of WiDr cells incubated for 18 hours with 10 % FCS and 70  $\mu\text{M}$  TSPP (red fluorescence) alone or in preparations with 100  $\mu\text{M}$  P123 or F127 or F68. Cells were exposed to LT (1 hour) and Hoechst (15 min) before imaging. Images showing the fluorescence from TSPP and fluorescence dyes are presented both separately and combined. White color shows colocalized fluorochromes. The color contrast and brightness in the images were adjusted to optimize the visualization.

Fig. S12

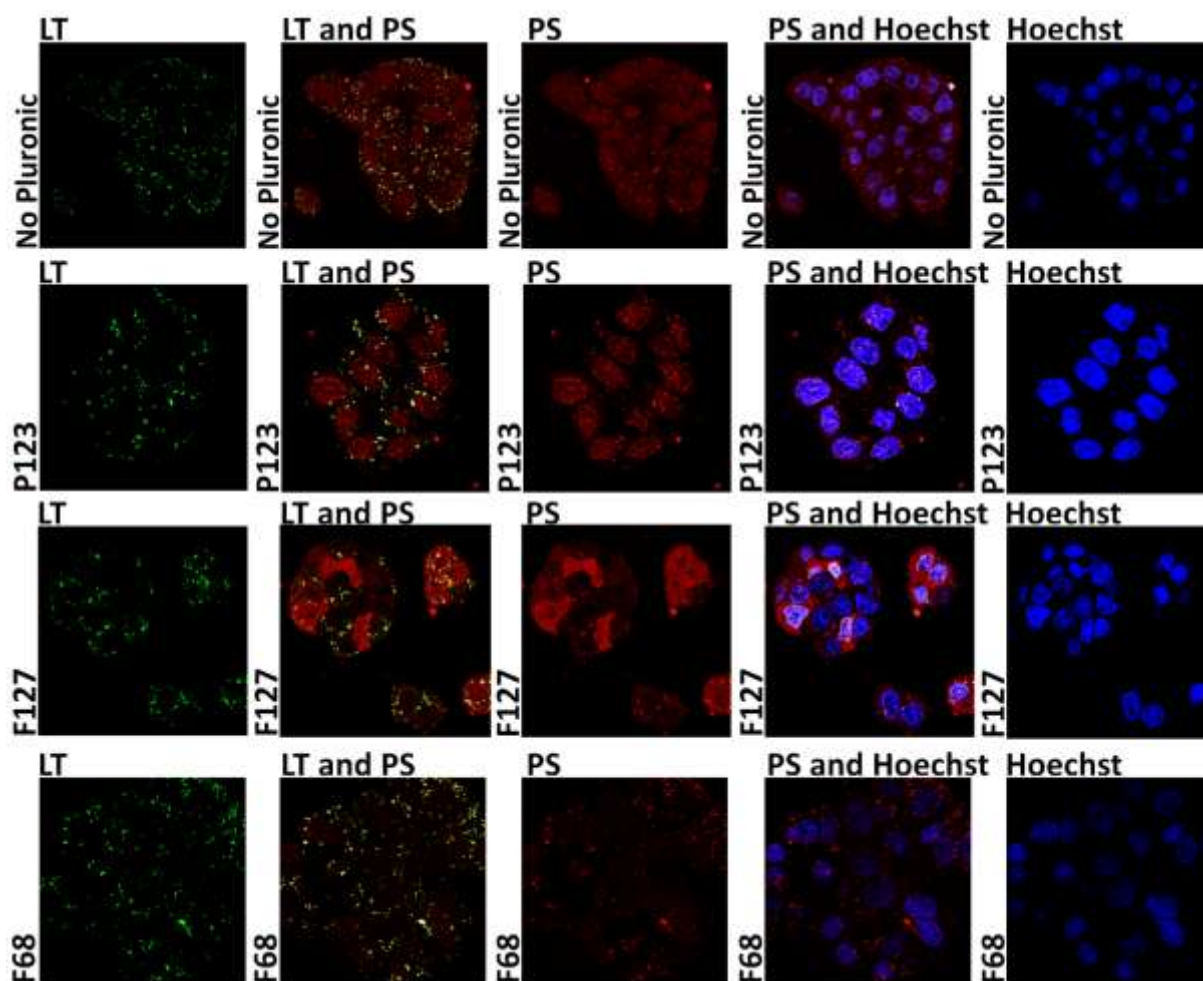

Confocal microscopy of WiDr cells incubated for 18 hours with 10 % FCS and 70  $\mu$ M TCPP (red fluorescence) alone or in preparations with 100  $\mu$ M P123 or F127 or F68. Cells were exposed to LT (1 hour) and Hoechst (15 min) before imaging. Images showing the fluorescence from TCPP and fluorescence dyes are presented both separately and combined. White color indicates colocalized fluorochromes. The color contrast and brightness in the images were adjusted to optimize the visualization.

**Fig. S13**

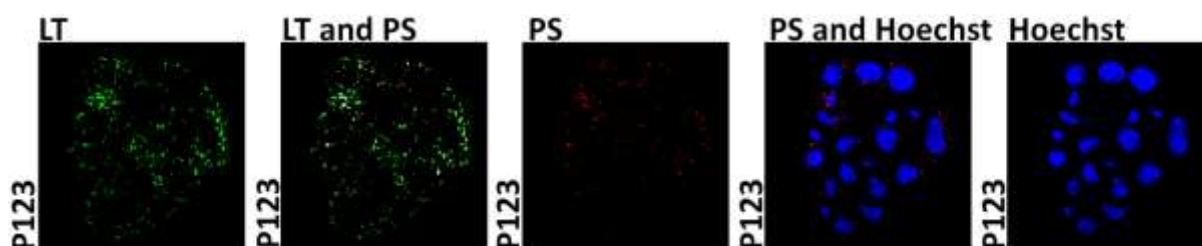

Confocal microscopy images of WiDr cells incubated for 18 hours with 10 % FCS and 1  $\mu$ M THPP (red fluorescence) alone or in preparations with 100  $\mu$ M P123. Cells were exposed to LT (1 hour) and Hoechst (15 min) before imaging. Images showing the fluorescence from THPP and fluorescence dyes are presented both separately and combined. White color shows colocalized fluorochromes. The color contrast and brightness in the images were adjusted to optimize the visualization.

**Table S1**

| <b>Formulation</b> | <b>LD<sub>50</sub> (μM)</b> |
|--------------------|-----------------------------|
| P123 alone         | 415 ± 10                    |
| P123 + TAPP 1 μM   | 450 ± 45                    |
| P123 + THPP 1 μM   | 160 ± 45                    |
| P123 + THPP 0.1 μM | 190 ± 30                    |
| P123 + TSPP 70 μM  | 305 ± 60                    |
| P123 + TCPP 30 μM  | 50 ± 5                      |
| F127 + TCPP 30 μM  | 975 ± 25                    |

Dark toxicity (expressed as LD<sub>50</sub>, given in μM of Pluronics) for different formulations, used to treat (18 hours) WiDr cancer cells. LD<sub>50</sub> was > 1000 μM for other formulations containing F68, L44 and F127. LD<sub>50</sub> was calculated, based upon 2 independent experiments. Values are given with standard error of two independent experiments (n = 6).

**Table S2**

| Cell line  | LD <sub>50</sub> (μM) |          |          |
|------------|-----------------------|----------|----------|
|            | P123                  | L44      | F127     |
| MES-SA     | 365 ± 95              | 913 ± 88 | > 1000   |
| A-431      | 885 ± 115             | 528 ± 8  |          |
| SK-BR-3    | 953 ± 48              | 833 ± 3  |          |
| BT-20      | 393 ± 43              | > 1000   | 743 ± 18 |
| SK-LMS-1   | 350 ± 100             |          | 835 ± 5  |
| HT-1080    | 73 ± 23               |          | > 1000   |
| DU-145     | 135 ± 15              |          |          |
| MDA-MB-231 | 168 ± 18              |          |          |
| WiDr       | 415 ± 10              |          |          |
| Zr-75-1    | > 1000                |          |          |
| SK-OV-3    |                       |          |          |

Dark toxicity (expressed as LD<sub>50</sub>, given in μM of Pluronics) for different cancer cell lines, subjected to 18 hours treatment with Pluronics P123, L44 and F127. In case of F68, LD<sub>50</sub> was > 1000 μM for all cell lines. LD<sub>50</sub> was calculated, based upon 2 independent experiments. Values are given with standard error of two independent experiments (n = 6).
